# Supplementary material for: Understanding Outdoor Gyms in Public Open Spaces: A Systematic Review and Integrative Synthesis of Qualitative and Quantitative Evidence
Source: Int J Environ Res Public Health. 2018 Mar 25;15(4):590. doi: 10.3390/ijerph15040590 (PMC5923632; doi:10.3390/ijerph15040590)
Supplement: Supplementary file 1 [file ijerph-15-00590-s001.zip › Table S1. Data Extraction.pdf]

| No. | Study                  | Year | Type                  | Country           | Study Aim                                                                                                                                                                                                                                                                                                                                                                                     | Participant Characteristics                                               | Age              | n                                                                                                            | Design                                                                                                                                                                                                             | Data Credibility                                                        | Sample Site                                                                                                                                                         | Result                                                                                                                                                                                                                                                                                                                                                                                                                                                                                                                                                                                                                                                                                                                                                                                                                                                                                                                                                                           |
|-----|------------------------|------|-----------------------|-------------------|-----------------------------------------------------------------------------------------------------------------------------------------------------------------------------------------------------------------------------------------------------------------------------------------------------------------------------------------------------------------------------------------------|---------------------------------------------------------------------------|------------------|--------------------------------------------------------------------------------------------------------------|--------------------------------------------------------------------------------------------------------------------------------------------------------------------------------------------------------------------|-------------------------------------------------------------------------|---------------------------------------------------------------------------------------------------------------------------------------------------------------------|----------------------------------------------------------------------------------------------------------------------------------------------------------------------------------------------------------------------------------------------------------------------------------------------------------------------------------------------------------------------------------------------------------------------------------------------------------------------------------------------------------------------------------------------------------------------------------------------------------------------------------------------------------------------------------------------------------------------------------------------------------------------------------------------------------------------------------------------------------------------------------------------------------------------------------------------------------------------------------|
| 1   | Chow (2013)            | 2013 | Peer-reviewed journal | Taiwan            | Discover seniors' perception of, and needs for, OFE, thereby providing insight contributing to the planning and design of parks to improve park-based physical activity among older adults                                                                                                                                                                                                    | User                                                                      | 50 to 97         | 55 Outdoor Fitness equipment user                                                                            | Qualitative: Semi-structured interview (20 to 45 minutes)                                                                                                                                                          | peer debriefing double checked the content and accuracy of interviews   | 2 parks in Taiwan (Both with 6 pieces of equipments)                                                                                                                | Themes<br>-Additional park feature to supplement walking or group activity<br>-Enjoyable natural environment<br>-Health Purpose/Rehabilitation<br>-Maintenance and management<br>-Developed new friendships from frequent visits<br>-Individualized style using the equipment                                                                                                                                                                                                                                                                                                                                                                                                                                                                                                                                                                                                                                                                                                    |
| 2   | Copeland et al. (2017) | 2017 | Peer-reviewed journal | Canada            | 1) Examine how frequently active park equipment is used<br>2) Determine if active park fitness equipment may attract adults to park<br>3) Determine if PA intensity was higher among those who used the fitness equipment as compared to those who used parks in other ways<br>4) Garner community perceptions about active parks and ways to increase use                                    | User and Non-user                                                         | 18-60+           | 139                                                                                                          | Mixed Methods: Observation + Face-to-face interview (10 -15 minutes)                                                                                                                                               | Osborne's suggestions establish trustworthiness of themes and subthemes | 2 parks in Alberta<br>-one active park with 5 machines clustered together<br>-one had 5 separate stations, each with 3-4 machines and walking paths connecting them | -Theme 1: Health benefits<br>-Theme 2: Accessibility<br>-Theme 3: Benefits for families<br>Themes identified to increase park use<br>-Theme 4: Increase advertising within and outside the park<br>-Theme 5: Need for improved ground materials around the equipment<br>-Theme 6: Upkeep of the areas around the equipment to ensure proper drainage after rain<br>-Theme 7: Ensure adequate lighting<br>-Theme 8: Ensure the equipment remains remain in good order<br>-Theme 9: Locate the equipment closer to other attractions such as playgrounds<br>-Theme 10: Improved instructions on the equipment and onsite trainers                                                                                                                                                                                                                                                                                                                                                  |
| 3   | Cranney et al. (2016)  | 2016 | Peer-reviewed journal | Australia         | 1) Assess the impact of the installation and promotion of an outdoor gym in park setting on physical activity levels of park users<br>2) Examine the characteristics of outdoor gym users, motivators, enablers and barriers to use                                                                                                                                                           | User and Non-user                                                         | 42.7             | Post-installation: 534 Park User<br>219 Outdoor Gym User<br>Follow-up: 322 Outdoor Gym User<br>474 Park user | Mixed Model: Before-after time series design with repeated observations and intercept interviews (Open-ended questions included motivators, enablers and barriers to outdoor gym use ) Brief interview (5 minutes) | Not evident                                                             | Maroubra, Sydney                                                                                                                                                    | 1) Most cited reason for using outdoor gym were to a) improve fitness (34%), and gain strength or tone muscle (26%)<br>2) Main enabler for outdoor gym use ited was for different types of equipment (25%), shade (15%) and more equipment (9%)<br>3) Most cited reason for not using the gym included lack of awareness of the outdoor gym (17%), a general dislike of or disinterest in the outdoor gym (15%), preference for a private gym (8%), no time (8%), not living close to the park (6%)                                                                                                                                                                                                                                                                                                                                                                                                                                                                              |
| 4   | Choi et al. (2016)     | 2016 | Thesis                | Hong Kong         | 1) To assess the usage of elderly fitness corner at area of low socio-economic status<br>2) To explore the how elderly user perceive the facility                                                                                                                                                                                                                                             | User                                                                      | mean age=70      | 12                                                                                                           | Mix-model: Observation + Indepth interview                                                                                                                                                                         | Not evident                                                             | 1 Park at area of low-socioeconomic status                                                                                                                          | Themes :<br>-Exercise at natural environment<br>-Weather as barrier<br>-Exercise revived the body, improved physical capability and joint movement<br>-Emotional well-being improvement<br>-The needs of maintenance and management for facility                                                                                                                                                                                                                                                                                                                                                                                                                                                                                                                                                                                                                                                                                                                                 |
| 5   | Salin et al (2013)     | 2013 | Peer-reviewed journal | Brazil            | 1) To describe the perception of older adults in terms of the motivation for entry and permanence in the Joinville AMI program                                                                                                                                                                                                                                                                | User                                                                      | mean age = 67.22 | 163                                                                                                          | Pure-qualitative Semi-structured interview                                                                                                                                                                         | Not evident                                                             | 15 AMIs city of Joinville, Santa Catarina                                                                                                                           | -Pursuit of health<br>-perceived benefits<br>Importance of socialization, presence of instructors<br>-Prevention<br>-need because of a specific disease<br>-possibility of leisure<br>-voluntarily<br>-free of charge<br>-encouragement of other people                                                                                                                                                                                                                                                                                                                                                                                                                                                                                                                                                                                                                                                                                                                          |
| 6   | Lee. (2015)            | 2015 | Thesis                | China             | 1) Usage; 2) Problems arised from using national fitness path<br>3) Provide recommendation                                                                                                                                                                                                                                                                                                    | User and Non-user                                                         | 18-75            | 495                                                                                                          | Mix-model: Literature review, survey, interview                                                                                                                                                                    | Not reported                                                            | Chengde area countryside                                                                                                                                            | ‘-強身健體，減肥，人際交流，娛樂休閒 (Strengthen Bodily Health, Weight-reduction, Social Interaction, Leisure pursuit)<br>-器材配備不充足 (Inadequate equipment)<br>-器材損壞 (broken equipment)<br>-體育鍛煉意識不夠 (Inadequate knowledge in exercise)<br>-社會體育指導員配備不足 (Inadequate exercise instructors)’                                                                                                                                                                                                                                                                                                                                                                                                                                                                                                                                                                                                                                                                                                          |
| 7   | Cohen (2012)           | 2012 | Peer-reviewed journal | USA               | (a) how well is the TPL fitness equipment used after installation?;<br>(b) which age, gender, race/ethnic groups use it, how often do they use it, and do they use it correctly?;<br>(c) overall, do more people use the parks? (Including both Fitness Zones and other park activity areas), and are park users more physically active in the parks than before the equipment was installed? | Observation: Park user and fitness zone user<br>Survey: Fitness zone user | 15-60+           | Interviewed 742 adult visitors at baseline, 942 at the first follow-up, and 952 at the second                | Quantitative Observational design + survey                                                                                                                                                                         | Not applicable                                                          | 12 Parks ( 48th street, Alondra, Athens, Cerritos, Gilbert, Ladera, Pathfinder, Salazar, Slauson, South, Steinmetz, Trinity)                                        | -Peak usage time 9:30 - 11:30 and 3:30-5:30;<br>-Fitness Zone respondents did not differ demographically from the other park users interviewed: 80% Latino; 9% African; American; 61% female; average age = 40 years, sd=12.5, p=0.94;<br>-Most common reason for using the fitness equipment is losing weight                                                                                                                                                                                                                                                                                                                                                                                                                                                                                                                                                                                                                                                                   |
| 8   | Mora (2012)            | 2012 | Peer-reviewed journal | Chile             | Presents the results of a systematic observation and a survey of four open gyms                                                                                                                                                                                                                                                                                                               | Observation: User<br>Survey: User                                         | 15-78            | 166 (survey)                                                                                                 | Quantitative Observational design + survey                                                                                                                                                                         | Not applicable                                                          | 4 Open gyms ( PdeValdivia, San Ignacio, Tobalaba, Canal San Carlos)                                                                                                 | -Majority of the user is young adult<br>-little difference between males and females in the four days of the observation, for women represented between 45% and 51% of users each day<br>-At the weekend, the proportion of elders reached 14% and the young adults represented 46%. On weekdays, the opposite was the rule, as young adults represented 59% of people and elders only 3%.<br>-87% combined these of gyms with other types of exercise                                                                                                                                                                                                                                                                                                                                                                                                                                                                                                                           |
| 9   | Silbson et al. (2013)  | 2017 | Peer-reviewed journal | Western Australia | Examine people's awareness, use, perceptions and attitudes in relation to specific type of outdoor exercise equipment                                                                                                                                                                                                                                                                         | Park visitors                                                             | 18 - 65+         | 400 (Survey)                                                                                                 | Quantitative: Self-completed questionnaire                                                                                                                                                                         | Not applicable                                                          | 1 urban park in Perth, Western Australia                                                                                                                            | ‘-Primarily used by adult<br>-Park user who usually exercise at vigorous level of intensity were more likely than those that exercise at low level of intensity to agree with the statement 'This equipment has increased my use of park'<br>-Stretch station user indicate that they 'enjoy using the equipment' (mean=4.16) (7-point likert scale)<br>-Stretch station user rated on average 2.71 on a 7-point likert scale on 'I come to the park specifically because of the stretching equipment'<br>-Stretch station user rated on average 3.45 on a 7-point likert scale on the statement 'I feel fitter because I use this equipment'<br>-Stretch station user rated on average 3.77 on a 7-point likert-scale on the statement 'I only do this type of exercise because the equipment is freely available'<br>-Stretch station user rated on average 4.37 on a 7-point likert scale on the statement 'The local [government] should provide more equipment in the park' |
